# Supplementary material for: Fluoroquinolones Hybrid Molecules as Promising Antibacterial Agents in the Fight against Antibacterial Resistance
Source: MDPI journal article supplement (doi:10.3390/pharmaceutics14081749), 2022-08-22
Supplement: s1 [file s1]

# Fluoroquinolones Hybrid Molecules as Promising Antibacterial Agents in the Fight against Antibacterial Resistance

Ioana-Andreea Lungu, Octavia-Laura Moldovan, Victoria Biriş and Aura Rusu

**Table S1.** Antimicrobial spectrum and indications for the antibacterial (F)QNs for human use; the generation is mentioned in parentheses (Ref. = references).

| Antibacterial (F)QNs              | Antimicrobial spectrum, indications                                                                                                                                                                                                                                                                                                                                                                                                                                                                                                                                                                                                                                                 | Ref.  |
|-----------------------------------|-------------------------------------------------------------------------------------------------------------------------------------------------------------------------------------------------------------------------------------------------------------------------------------------------------------------------------------------------------------------------------------------------------------------------------------------------------------------------------------------------------------------------------------------------------------------------------------------------------------------------------------------------------------------------------------|-------|
| Nalidixic acid (1 <sup>st</sup> ) | Urinary tract infections caused by Gram-negative bacteria ( <i>Escherichia coli</i> , <i>Klebsiella</i> , <i>Enterobacter</i> , <i>Citrobacter</i> , and <i>Proteus</i> spp., <i>Shigella</i> , <i>Salmonella</i> , and <i>Providencia</i> ).<br>Resistant pathogens: Strains of <i>Pseudomonas aeruginosa</i> , <i>Neisseria gonorrhoeae</i> , <i>Haemophilus influenzae</i> , Gram-positive cocci and anaerobes.                                                                                                                                                                                                                                                                  | [1]   |
| Pefloxacin (2 <sup>nd</sup> )     | Gram-negative organisms and staphylococci; respiratory tract, urogenital tract, bone and joint infections, septicemia and surgical infections.                                                                                                                                                                                                                                                                                                                                                                                                                                                                                                                                      | [2]   |
| Norfloxacin (2 <sup>nd</sup> )    | Gram-negative and Gram-positive aerobic bacteria.<br>Urinary tract infections caused by <i>Escherichia coli</i> , <i>Klebsiella pneumoniae</i> , <i>Enterobacter cloacae</i> , <i>Proteus mirabilis</i> , indole-positive <i>Proteus</i> spp., including <i>Proteus vulgaris</i> , <i>Providencia rettgeri</i> , <i>Morganella morganii</i> , <i>Pseudomonas aeruginosa</i> , <i>Staphylococcus aureus</i> , and <i>Staphylococcus epidermidis</i> , and group-D streptococci.<br>Generally not effective against anaerobic bacteria.<br>The fluorine atom facilitates the activity against Gram-positive organisms, while the piperazine moiety improves antipseudomonal activity. | [1]   |
| Ciprofloxacin (2 <sup>nd</sup> )  | Bacterial gastroenteritis caused by Gram-negative bacilli (enteropathogenic <i>Escherichia coli</i> , <i>Salmonella</i> spp. (including <i>Salmonella typhi</i> ), <i>Shigella</i> spp., <i>Vibrio</i> spp., and <i>Aeromonas hydrophilia</i> ); respiratory tract infections (especially bronchitis and pneumonia caused by Gram-negative bacteria); infections of the skin, soft tissues, bones, and joints; uncomplicated and complicated urinary tract infections caused by Gram-negative bacteria; chronic infections characterised by renal tissue involvement; venereal diseases; postexposure treatment of inhalational anthrax.                                            | [1]   |
| Ofloxacin (2 <sup>nd</sup> )      | Similar to ciprofloxacin.                                                                                                                                                                                                                                                                                                                                                                                                                                                                                                                                                                                                                                                           | [1]   |
| Nadifloxacin (2 <sup>nd</sup> )   | Gram-positive (e.g., <i>Staphylococcus aureus</i> , methicillin-resistant <i>Staphylococcus aureus</i> (MRSA), and <i>Staphylococcus epidermidis</i> ) and Gram-negative (e.g., <i>Pseudomonas aeruginosa</i> ) bacteria, including anaerobes ( <i>Propionibacterium acnes</i> ); topical use.                                                                                                                                                                                                                                                                                                                                                                                      | [3,4] |

| Antibacterial (F)QNs            | Antimicrobial spectrum, indications                                                                                                                                                                                                                                                                                                                                                                                                                                                                                                                                                                                                                                                                                                                                                                        | Ref.        |
|---------------------------------|------------------------------------------------------------------------------------------------------------------------------------------------------------------------------------------------------------------------------------------------------------------------------------------------------------------------------------------------------------------------------------------------------------------------------------------------------------------------------------------------------------------------------------------------------------------------------------------------------------------------------------------------------------------------------------------------------------------------------------------------------------------------------------------------------------|-------------|
| Levofloxacin (3 <sup>rd</sup> ) | Antibacterial spectrum and indications similar to the racemate (ofloxacin).                                                                                                                                                                                                                                                                                                                                                                                                                                                                                                                                                                                                                                                                                                                                | [1,5–7]     |
| Moxifloxacin (4 <sup>th</sup> ) | Community-acquired respiratory tract infections caused by typical and atypical respiratory pathogens, intracellular respiratory pathogens; skin and skin structure infections, intra-abdominal infections;<br>Gram-negative pathogens and anaerobes; <i>Mycobacteria</i> spp., <i>Legionella</i> .                                                                                                                                                                                                                                                                                                                                                                                                                                                                                                         | [7–11]      |
| Gemifloxacin (4 <sup>th</sup> ) | Acute exacerbations of chronic bronchitis, community-acquired pneumonia; <i>Streptococcus pneumoniae</i> , <i>Klebsiella pneumoniae</i> , <i>Moraxella catarrhalis</i> , <i>Mycoplasma pneumoniae</i> , <i>Chlamydia pneumoniae</i> , <i>Haemophilus influenzae</i> ; withdrawn by the EMA in 2009 due to concern for genotoxic side effects.                                                                                                                                                                                                                                                                                                                                                                                                                                                              | [3,7,12–14] |
| Besifloxacin (4 <sup>th</sup> ) | Topical use (ophthalmic); bacterial conjunctivitis.                                                                                                                                                                                                                                                                                                                                                                                                                                                                                                                                                                                                                                                                                                                                                        | [15,16]     |
| Finafloxacin (4 <sup>th</sup> ) | Acute otitis externa caused by susceptible strains of <i>Pseudomonas aeruginosa</i> and <i>Staphylococcus aureus</i> .                                                                                                                                                                                                                                                                                                                                                                                                                                                                                                                                                                                                                                                                                     | [17,18]     |
| Delafloxacin (4 <sup>th</sup> ) | Acute bacterial skin and skin structure infections caused by <i>Staphylococcus aureus</i> (including MRSA), <i>Staphylococcus haemolyticus</i> , <i>Staphylococcus lugdunensis</i> , <i>Streptococcus pyogenes</i> , <i>Streptococcus agalactiae</i> , <i>Escherichia coli</i> , <i>Klebsiella pneumoniae</i> , <i>Enterobacter cloacae</i> , <i>Pseudomonas aeruginosa</i> ;<br>Community-acquired bacterial pneumonia caused by <i>Streptococcus pneumoniae</i> , <i>Staphylococcus aureus</i> (methicillin-susceptible (MSSA) isolates only), <i>Klebsiella pneumoniae</i> , <i>Escherichia coli</i> , <i>Pseudomonas aeruginosa</i> , <i>Haemophilus influenzae</i> , <i>Haemophilus parainfluenzae</i> , <i>Chlamydia pneumoniae</i> , <i>Legionella pneumophila</i> , <i>Mycoplasma pneumoniae</i> . | [19,20]     |

**Table S2.** Side effects/adverse reactions of the antibacterial (F)QNs <sup>1</sup>.

| Affected system                                         | Symptom                                     | Higher risk                            | Lower risk                                                                                                 |
|---------------------------------------------------------|---------------------------------------------|----------------------------------------|------------------------------------------------------------------------------------------------------------|
| <b>Musculoskeletal and connective tissues</b>           | Arthralgia                                  | Ciprofloxacin                          | Norfloxacin, Ofloxacin (1-3%), Levofloxacin (0.1-1%), Moxifloxacin (0.1-1%), Gemifloxacin ( $\leq 0.1\%$ ) |
|                                                         | Back pain                                   |                                        | Moxifloxacin (0.1-1%), Gemifloxacin ( $\leq 0.1\%$ )                                                       |
|                                                         | Joint stiffness                             |                                        | Ciprofloxacin                                                                                              |
|                                                         | Leg cramps                                  |                                        | Gemifloxacin ( $\leq 0.1\%$ )                                                                              |
|                                                         | Muscle injuries (including rupture)         |                                        | Levofloxacin (postmarketing)                                                                               |
|                                                         | Muscle spasms                               |                                        | Norfloxacin, Moxifloxacin (0.1-1%)                                                                         |
|                                                         | Muscle weakness                             |                                        | Ciprofloxacin, Moxifloxacin (postmarketing)                                                                |
|                                                         | Myalgia                                     | Ciprofloxacin, Delafloxacin ( $<2\%$ ) | Norfloxacin, Ofloxacin (1-3%), Levofloxacin (0.1-1%)                                                       |
|                                                         | Myasthenia                                  |                                        | Ciprofloxacin                                                                                              |
|                                                         | <i>Myasthenia Gravis</i> (exacerbation)     |                                        | Ciprofloxacin, Norfloxacin, Moxifloxacin (postmarketing)                                                   |
|                                                         | Pain in extremity                           |                                        | Moxifloxacin (0.1-1%)                                                                                      |
|                                                         | Rhabdomyolysis                              |                                        | Levofloxacin (postmarketing)                                                                               |
|                                                         | Skeletal (and/or Musculoskeletal) pain      |                                        | Levofloxacin (0.1-1%), Moxifloxacin (0.1-1%)                                                               |
|                                                         | Tendinitis                                  | Ciprofloxacin, Norfloxacin             | Nalidixic acid, Levofloxacin (0.1-1%)                                                                      |
|                                                         | Tendon ruptures (including Achilles tendon) | Ciprofloxacin, Norfloxacin             | Nalidixic acid, Levofloxacin (postmarketing), Moxifloxacin (postmarketing)                                 |
| <b>Central nervous system and psychiatric disorders</b> | 6th cranial nerve palsy                     |                                        | Nalidixic acid                                                                                             |
|                                                         | Abnormal EEG (electroencephalogram)         |                                        | Levofloxacin (postmarketing)                                                                               |
|                                                         | Abnormal gait                               |                                        | Ciprofloxacin, Moxifloxacin (postmarketing)                                                                |
|                                                         | Agitation                                   | Ciprofloxacin                          | Pefloxacin, Levofloxacin (0.1-1%), Moxifloxacin (0.1-1%)                                                   |
|                                                         | Altered coordination                        |                                        | Moxifloxacin (postmarketing)                                                                               |
|                                                         | Anorexia                                    |                                        | Ciprofloxacin, Norfloxacin (0.3-1.0%), Levofloxacin (0.1-1%), Moxifloxacin (0.1-1%), Gemifloxacin (0.1-1%) |
|                                                         | Anxiety                                     | Ciprofloxacin, Delafloxacin ( $<2\%$ ) | Pefloxacin, Ofloxacin (1-3%), Levofloxacin (0.1-1%), Moxifloxacin (0.1-1%)                                 |

| Affected system | Symptom                                                         | Higher risk                                                                                                                                                                                | Lower risk                                                                           |
|-----------------|-----------------------------------------------------------------|--------------------------------------------------------------------------------------------------------------------------------------------------------------------------------------------|--------------------------------------------------------------------------------------|
|                 | Asthenia                                                        |                                                                                                                                                                                            | Norfloxacin (0.3-1.0%), Ofloxacin (<1%), Moxifloxacin (0.1-1%), Gemifloxacin (≤0.1%) |
|                 | Ataxia                                                          |                                                                                                                                                                                            | Ciprofloxacin, Norfloxacin                                                           |
|                 | Brief convulsions/<br>Seizures (eg. <i>Status Epilepticus</i> ) | Ciprofloxacin                                                                                                                                                                              | Nalidixic acid, Norfloxacin, Ofloxacin (1-3%), Levofloxacin (0.1-1%)                 |
|                 | Cognitive change                                                |                                                                                                                                                                                            | Ofloxacin (1-3%)                                                                     |
|                 | Confusional state                                               | Ciprofloxacin                                                                                                                                                                              | Norfloxacin, Ofloxacin (1-3%), Levofloxacin (0.1-1%), Moxifloxacin (0.1-1%)          |
|                 | Delirium                                                        |                                                                                                                                                                                            | Ciprofloxacin,                                                                       |
|                 | Depersonalisation                                               |                                                                                                                                                                                            | Ciprofloxacin                                                                        |
|                 | Depression                                                      | Ciprofloxacin                                                                                                                                                                              | Ofloxacin (1-3%), Levofloxacin (0.1-1%), Moxifloxacin (0.1-1%)                       |
|                 | Disorientation                                                  |                                                                                                                                                                                            | Moxifloxacin (0.1-1%)                                                                |
|                 | Dizziness                                                       | Nalidixic acid, Ciprofloxacin, Norfloxacin (2.6%), Levofloxacin (≥1), Moxifloxacin (≥1%), Gemifloxacin (1.7%), Delafloxacin (<2%)                                                          |                                                                                      |
|                 | Dream abnormality                                               | Delafloxacin (<2%)                                                                                                                                                                         | Ofloxacin (1-3%), Levofloxacin (0.1-1%)                                              |
|                 | Drowsiness                                                      | Nalidixic acid                                                                                                                                                                             |                                                                                      |
|                 | Encephalopathy                                                  |                                                                                                                                                                                            | Levofloxacin (postmarketing)                                                         |
|                 | Euphoria                                                        |                                                                                                                                                                                            | Ofloxacin (1-3%)                                                                     |
|                 | Guillain-Barré                                                  |                                                                                                                                                                                            | Norfloxacin                                                                          |
|                 | Headache                                                        | Nalidixic acid, Ciprofloxacin, Norfloxacin (2.0%), Ofloxacin (9%), Levofloxacin (≥1), Moxifloxacin (≥1%), Gemifloxacin (4.2%), Besifloxacin (1-2%), Delafloxacin (3%), Finafloxacin (1.8%) |                                                                                      |
|                 | Hallucinations                                                  | Ciprofloxacin                                                                                                                                                                              | Norfloxacin, Ofloxacin (1-3%), Levofloxacin (0.1-1%), Moxifloxacin (0.1-1%)          |
|                 | Hyperkinesias                                                   |                                                                                                                                                                                            | Levofloxacin (0.1-1%)                                                                |
|                 | Hypertonia                                                      |                                                                                                                                                                                            | Ciprofloxacin, Levofloxacin (0.1-1%)                                                 |
|                 | Increased intracranial pressure                                 | Ciprofloxacin                                                                                                                                                                              | Nalidixic acid, Norfloxacin                                                          |
|                 | Insomnia                                                        | Ciprofloxacin, Ofloxacin (7%), Levofloxacin (≥1), Moxifloxacin (≥1%), Delafloxacin (<2%)                                                                                                   | Gemifloxacin (0.1-1%)                                                                |
|                 | Irritability                                                    |                                                                                                                                                                                            | Ciprofloxacin                                                                        |
|                 | Lethargy                                                        |                                                                                                                                                                                            | Moxifloxacin (0.1-1%)                                                                |
|                 | Malaise                                                         |                                                                                                                                                                                            | Ciprofloxacin, Ofloxacin (<1%), Moxifloxacin (0.1-1.%)                               |

| Affected system              | Symptom                                  | Higher risk                                | Lower risk                                                                                                      |
|------------------------------|------------------------------------------|--------------------------------------------|-----------------------------------------------------------------------------------------------------------------|
|                              | Manic reaction                           |                                            | Ciprofloxacin                                                                                                   |
|                              | Migraine                                 |                                            | Ciprofloxacin                                                                                                   |
|                              | Myoclonus                                |                                            | Ciprofloxacin, Norfloxacin                                                                                      |
|                              | Nervousness                              | Ciprofloxacin, Ofloxacin (1-3%)            | Pefloxacin, Moxifloxacin (0.1-1%)                                                                               |
|                              | Nightmares                               | Ciprofloxacin                              | Levofloxacin (0.1-1%)                                                                                           |
|                              | Paranoia                                 | Ciprofloxacin                              | Levofloxacin (postmarketing)                                                                                    |
|                              | Phobia                                   |                                            | Ciprofloxacin                                                                                                   |
|                              |                                          |                                            | Norfloxacin, Levofloxacin                                                                                       |
|                              | Psychotic reactions                      |                                            | (postmarketing), Moxifloxacin                                                                                   |
|                              |                                          |                                            | (postmarketing)                                                                                                 |
|                              | Restlessness                             |                                            | Ciprofloxacin, Norfloxacin,                                                                                     |
|                              |                                          |                                            | Moxifloxacin (0.1-1%)                                                                                           |
|                              | Sleep disorders                          | Ofloxacin (1-3%)                           | Levofloxacin (0.1-1%)                                                                                           |
|                              | Somnolence                               | Ofloxacin (1-3%)                           | Levofloxacin (0.1-1%), Moxifloxacin                                                                             |
|                              |                                          |                                            | (0.1-1%), Gemifloxacin (0.1-1%)                                                                                 |
|                              | Suicide attempt and<br>Suicidal ideation |                                            | Levofloxacin (postmarketing),<br>Moxifloxacin (postmarketing)                                                   |
|                              | (Pre)Syncope                             | Ofloxacin (1-3%), Delafloxacin<br>(<2%)    | Levofloxacin (0.1-1%), Moxifloxacin<br>(0.1-1%), Gemifloxacin<br>(postmarketing)                                |
|                              | Toxic psychosis                          | Ciprofloxacin                              | Nalidixic acid, Norfloxacin                                                                                     |
|                              | Transient ischemic<br>attack             |                                            | Gemifloxacin (postmarketing)                                                                                    |
|                              |                                          |                                            | Norfloxacin, Ofloxacin (1-3%),<br>Levofloxacin (0.1-1%), Moxifloxacin<br>(0.1-1%), Gemifloxacin (≤0.1%)         |
|                              | Tremor                                   | Ciprofloxacin                              | Ciprofloxacin                                                                                                   |
|                              | Twitching                                |                                            | Ofloxacin (1-3%), Levofloxacin (0.1-1%),<br>Gemifloxacin (≤0.1%)                                                |
|                              | Vertigo                                  | Nalidixic acid                             |                                                                                                                 |
|                              | Weakness                                 | Nalidixic acid, Ciprofloxacin              | Norfloxacin                                                                                                     |
| Peripheral<br>nervous system | Dysesthesia                              | Ciprofloxacin                              | Nalidixic acid, Norfloxacin                                                                                     |
|                              | Hypoesthesia                             | Ciprofloxacin, Delafloxacin (<2%)          | Nalidixic acid, Norfloxacin,<br>Moxifloxacin (0.1-1%)                                                           |
|                              | Paresthesia                              | Ciprofloxacin, Delafloxacin (<2%)          | Nalidixic acid, Norfloxacin (0.3-1.0%),<br>Ofloxacin (1-3%),<br>Levofloxacin (0.1-1%), Moxifloxacin<br>(0.1-1%) |
|                              | Peripheral<br>neuropathy                 | Ciprofloxacin                              | Nalidixic acid, Pefloxacin,<br>Norfloxacin, Levofloxacin<br>(postmarketing), Moxifloxacin<br>(postmarketing)    |
|                              | Polyneuropathy                           |                                            | Ciprofloxacin, Moxifloxacin<br>(postmarketing)                                                                  |
| Eyes/ Ears/ Nose/<br>Mouth   | Ageusia                                  |                                            | Ciprofloxacin, Levofloxacin<br>(postmarketing)                                                                  |
|                              | Anosmia                                  |                                            | Ciprofloxacin, Levofloxacin<br>(postmarketing)                                                                  |
|                              | Blurred vision                           | Besifloxacin (1-2%), Delafloxacin<br>(<2%) | Ciprofloxacin, Levofloxacin<br>(postmarketing), Moxifloxacin (0.1-1%)                                           |

| Affected system       | Symptom                                           | Higher risk                          | Lower risk                                                                                                                            |
|-----------------------|---------------------------------------------------|--------------------------------------|---------------------------------------------------------------------------------------------------------------------------------------|
|                       | Conjunctival redness                              | Besifloxacin (2%)                    |                                                                                                                                       |
|                       | Decreased visual acuity                           |                                      | Ciprofloxacin, Levofloxacin (postmarketing)                                                                                           |
|                       | Diplopia                                          |                                      | Ciprofloxacin, Norfloxacin, Levofloxacin (postmarketing)                                                                              |
|                       | Disturbed vision (eg. chromatopsia and photopsia) | Ofloxacin (1-3%)                     | Ciprofloxacin, Levofloxacin (postmarketing), Gemifloxacin ( $\leq 0.1\%$ )                                                            |
|                       | Dry mouth                                         | Ofloxacin (1-3%)                     | Moxifloxacin (0.1-1%), Gemifloxacin (0.1-1%)                                                                                          |
|                       | Dysgeusia                                         | Delafloxacin (<2%), Ofloxacin (1-3%) | Ciprofloxacin, Norfloxacin, Levofloxacin (postmarketing), Moxifloxacin (0.1-1%), Gemifloxacin (0.1-1%)                                |
|                       | Dysphonia                                         |                                      | Levofloxacin (postmarketing)                                                                                                          |
|                       | Ear discomfort                                    |                                      | Finaxofloxacin (0.3%)                                                                                                                 |
|                       | Ear pain                                          |                                      | Finaxofloxacin (0.5%)                                                                                                                 |
|                       | Ear pruritus                                      | Finaxofloxacin (1.3%)                |                                                                                                                                       |
|                       | Epistaxis                                         |                                      | Levofloxacin (0.1-1%), Ofloxacin (<1%)                                                                                                |
|                       | Eye irritation                                    | Besifloxacin (1-2%)                  |                                                                                                                                       |
|                       | Eye pain                                          | Besifloxacin (1-2%)                  |                                                                                                                                       |
|                       | Eye pruritus                                      | Besifloxacin (1-2%)                  |                                                                                                                                       |
|                       | Glossitis                                         |                                      | Levofloxacin (0.1-1%), Ciprofloxacin, Norfloxacin, Ofloxacin (1-3%), Levofloxacin (postmarketing), Moxifloxacin (postmarketing)       |
|                       | Hearing loss                                      |                                      | Ciprofloxacin, Norfloxacin, Ciprofloxacin                                                                                             |
|                       | Nystagmus                                         |                                      |                                                                                                                                       |
|                       | Oral candidiasis                                  | Delafloxacin (<2%)                   |                                                                                                                                       |
|                       | Otitis externa                                    | Finaxofloxacin (1.8%)                |                                                                                                                                       |
|                       | Otitis media                                      | Finaxofloxacin (1.3%)                |                                                                                                                                       |
|                       | Papilledema                                       |                                      | Nalidixic acid                                                                                                                        |
|                       | Parosmia                                          |                                      | Levofloxacin (postmarketing)                                                                                                          |
|                       | Photophobia                                       |                                      | Ofloxacin (1-3%)                                                                                                                      |
|                       | Retinal hemorrhage                                |                                      | Gemifloxacin (postmarketing)                                                                                                          |
|                       | Scotoma                                           |                                      | Levofloxacin (postmarketing)                                                                                                          |
|                       | Stomatitis                                        |                                      | Norfloxacin, Levofloxacin (0.1-1%), Ciprofloxacin, Norfloxacin, Ofloxacin (1-3%), Levofloxacin (postmarketing), Moxifloxacin (0.1-1%) |
|                       | Tinnitus                                          | Delafloxacin (<2%)                   |                                                                                                                                       |
|                       | Vertigo                                           | Delafloxacin (<2%)                   | Moxifloxacin (0.1-1%)                                                                                                                 |
|                       | Vision loss                                       |                                      | Moxifloxacin (postmarketing)                                                                                                          |
|                       | Uveitis                                           |                                      | Norfloxacin                                                                                                                           |
| Cardiovascular system | Angina Pectoris                                   |                                      | Ciprofloxacin, Moxifloxacin (0.1-1%)                                                                                                  |
|                       | Arrhythmia                                        |                                      | Ciprofloxacin, Norfloxacin                                                                                                            |
|                       | Atrial fibrillation                               |                                      | Moxifloxacin (0.1-1%)                                                                                                                 |
|                       | Bradycardia                                       | Delafloxacin (<2%)                   | Moxifloxacin (0.1-1%)                                                                                                                 |

| Affected system   | Symptom                      | Higher risk                                     | Lower risk                                                                                                            |
|-------------------|------------------------------|-------------------------------------------------|-----------------------------------------------------------------------------------------------------------------------|
|                   | Cardiac failure              |                                                 | Moxifloxacin (0.1-1%)                                                                                                 |
|                   | Cardiopulmonary arrest       |                                                 | Ciprofloxacin, Ofloxacin (<1%),<br>Levofloxacin (0.1-1%), ,<br>Moxifloxacin (0.1-1%),<br>Moxifloxacin (postmarketing) |
|                   | Cardiovascular collapse      |                                                 | Norfloxacin                                                                                                           |
|                   | Edema                        | Levofloxacin ( $\geq 1\%$ ), Delafloxacin (<2%) | Ofloxacin (<1%), Moxifloxacin (0.1-1%), Gemifloxacin (postmarketing)                                                  |
|                   | Hypertension                 | Delafloxacin (<2%)                              | Ofloxacin (<1%), Moxifloxacin (0.1-1%)                                                                                |
|                   | Hypotension                  | Delafloxacin (<2%)                              | Ciprofloxacin, Norfloxacin,<br>Ofloxacin (<1%), Moxifloxacin (0.1-1%)                                                 |
|                   | Myocardial infarction        |                                                 | Ciprofloxacin                                                                                                         |
|                   | Palpitations                 | Delafloxacin (<2%)                              | Ofloxacin (<1%), Levofloxacin (0.1-1%), Moxifloxacin (0.1-1%)                                                         |
|                   | Supraventricular tachycardia |                                                 | Gemifloxacin (postmarketing)                                                                                          |
|                   | Syncope                      |                                                 | Ciprofloxacin, Norfloxacin,<br>Ciprofloxacin, Levofloxacin                                                            |
|                   | Sinus tachycardia            | Delafloxacin (<2%)                              | (postmarketing), Moxifloxacin (0.1-1%)                                                                                |
|                   | <i>Torsade de pointes</i>    |                                                 | Ciprofloxacin, Norfloxacin,<br>Levofloxacin (postmarketing),<br>Moxifloxacin (postmarketing)                          |
|                   | Vasodilation                 |                                                 | Ofloxacin (<1%), Levofloxacin (postmarketing)                                                                         |
|                   | Ventricular arrhythmia       |                                                 | Ciprofloxacin, Levofloxacin (0.1-1%),                                                                                 |
|                   | Ventricular tachyarrhythmias |                                                 | Moxifloxacin (postmarketing)                                                                                          |
|                   | Ventricular tachycardia      |                                                 | Levofloxacin (0.1-1%),<br>Nalidixic acid, Ciprofloxacin,<br>Norfloxacin, Levofloxacin                                 |
|                   | QTc interval prolongation    |                                                 | (postmarketing), Moxifloxacin (0.1-1%), Gemifloxacin (postmarketing)                                                  |
| Respiratory tract | Asthma                       |                                                 | Moxifloxacin (0.1-1%)                                                                                                 |
|                   | Bronchospasm                 |                                                 | Ciprofloxacin, Moxifloxacin (0.1-1%)                                                                                  |
|                   | Cough                        |                                                 | Ofloxacin (1-3%)<br>Ciprofloxacin, Norfloxacin,                                                                       |
|                   | Dyspnea                      | Levofloxacin ( $\geq 1\%$ )                     | Moxifloxacin (0.1-1%),<br>Gemifloxacin ( $\leq 0.1\%$ )                                                               |
|                   | Hemoptysis                   |                                                 | Ciprofloxacin                                                                                                         |
|                   | Laryngeal edema              |                                                 | Ciprofloxacin                                                                                                         |
|                   | Pharyngeal edema             |                                                 | Ciprofloxacin, Norfloxacin                                                                                            |

| Affected system        | Symptom                         | Higher risk                                                                                                                                                                                    | Lower risk                                                                                  |
|------------------------|---------------------------------|------------------------------------------------------------------------------------------------------------------------------------------------------------------------------------------------|---------------------------------------------------------------------------------------------|
|                        | Pharyngitis                     | Ofloxacin (1-3%)                                                                                                                                                                               | Gemifloxacin ( $\leq 0.1\%$ )                                                               |
|                        | Pneumonia                       |                                                                                                                                                                                                | Gemifloxacin ( $\leq 0.1\%$ )                                                               |
|                        | Respiratory arrest              |                                                                                                                                                                                                | Ofloxacin (1-3%)                                                                            |
|                        | Rhinorrhea                      |                                                                                                                                                                                                | Ofloxacin (1-3%)                                                                            |
|                        | Wheezing                        |                                                                                                                                                                                                | Moxifloxacin (0.1-1%)                                                                       |
| Gastrointestinal tract |                                 | Nalidixic acid, Norfloxacin (1.6%), Ofloxacin (1-3%), Levofloxacin ( $\geq 1\%$ ), Moxifloxacin ( $\geq 1\%$ ), Gemifloxacin (2.2%), Delafloxacin ( $< 2\%$ )                                  | Ciprofloxacin                                                                               |
|                        | Abdominal discomfort/pain       |                                                                                                                                                                                                |                                                                                             |
|                        | Abdominal distension            |                                                                                                                                                                                                | Moxifloxacin (0.1-1%)                                                                       |
|                        | Constipation                    | Ofloxacin (1-3%), Levofloxacin ( $\geq 1\%$ ), Moxifloxacin ( $\geq 1\%$ )                                                                                                                     | Norfloxacin (0.3-1.0%), Gemifloxacin (0.1-1%)                                               |
|                        |                                 | Nalidixic acid, Ciprofloxacin (1.6%), Ofloxacin (4%),                                                                                                                                          |                                                                                             |
|                        | Diarrhea                        | Levofloxacin ( $\geq 1\%$ ), Moxifloxacin ( $\geq 1\%$ ), Gemifloxacin (5.0%), Delafloxacin (8%)                                                                                               | Norfloxacin (0.3-1.0%)                                                                      |
|                        |                                 |                                                                                                                                                                                                |                                                                                             |
|                        | Dyspepsia                       | Levofloxacin ( $\geq 1\%$ ), Moxifloxacin ( $\geq 1\%$ ), Delafloxacin ( $< 2\%$ )                                                                                                             | Norfloxacin (0.3-1.0%), Ofloxacin ( $< 1\%$ ), Gemifloxacin (0.1-1%)                        |
|                        | Dysphagia                       |                                                                                                                                                                                                | Norfloxacin                                                                                 |
|                        | Esophagitis                     |                                                                                                                                                                                                | Levofloxacin (0.1-1%), Norfloxacin (0.3-1.0%), Moxifloxacin (0.1-1%), Gemifloxacin (0.1-1%) |
|                        | Flatulence                      | Ofloxacin (1-3%)                                                                                                                                                                               |                                                                                             |
|                        |                                 |                                                                                                                                                                                                |                                                                                             |
|                        | Gastritis                       |                                                                                                                                                                                                | Levofloxacin (0.1-1%), Moxifloxacin (0.1-1%), Gemifloxacin (0.1-1%)                         |
|                        | Gastroenteritis                 |                                                                                                                                                                                                | Levofloxacin (0.1-1%), Moxifloxacin (0.1-1%), Gemifloxacin ( $\leq 0.1\%$ )                 |
|                        | Gastrointestinal bleeding       |                                                                                                                                                                                                | Ciprofloxacin                                                                               |
|                        | Gastrointestinal candidiasis    |                                                                                                                                                                                                | Ciprofloxacin                                                                               |
|                        | Gastrointestinal distress       | Ofloxacin (1-3%)                                                                                                                                                                               |                                                                                             |
|                        |                                 |                                                                                                                                                                                                |                                                                                             |
|                        | Gastroesophageal reflux disease |                                                                                                                                                                                                | Moxifloxacin (0.1-1%)                                                                       |
|                        | Intestinal perforation          |                                                                                                                                                                                                | Ciprofloxacin                                                                               |
|                        |                                 |                                                                                                                                                                                                |                                                                                             |
|                        | Nausea                          | Nalidixic acid, Ciprofloxacin (2.5%), Norfloxacin (2.6%), Ofloxacin (10%), Levofloxacin ( $\geq 1\%$ ), Moxifloxacin ( $\geq 1\%$ ), Gemifloxacin (3.7%), Delafloxacin (8%), Finafloxacin (1%) |                                                                                             |



| Affected system                    | Symptom                                                      | Higher risk                                                                                                                                          | Lower risk                                                                                                                                                         |
|------------------------------------|--------------------------------------------------------------|------------------------------------------------------------------------------------------------------------------------------------------------------|--------------------------------------------------------------------------------------------------------------------------------------------------------------------|
|                                    | Non-specified gastrointestinal disorder                      |                                                                                                                                                      | Gemifloxacin ( $\leq 0.1\%$ )                                                                                                                                      |
|                                    | Pancreatitis                                                 |                                                                                                                                                      | Ciprofloxacin, Norfloxacin, Levofloxacin (0.1-1%), Ciprofloxacin, Norfloxacin, Levofloxacin (0.1-1%), Gemifloxacin (postmarketing - antibiotic-associated colitis) |
|                                    | Pseudomembranous colitis (eg. <i>Clostridium difficile</i> ) | Delafloxacin ( $< 2\%$ )                                                                                                                             |                                                                                                                                                                    |
|                                    | Vomiting                                                     | Nalidixic acid, Ciprofloxacin (1%), Ofloxacin (4%), Levofloxacin ( $\geq 1\%$ ), Moxifloxacin ( $\geq 1\%$ ), Gemifloxacin (1.6%), Delafloxacin (2%) | Norfloxacin (0.3-1.0%), Gemifloxacin (0.1-1%)                                                                                                                      |
| <b>Hepatobiliary Disorders</b>     | Abnormal hepatic function                                    | Ciprofloxacin (1.3%)                                                                                                                                 | Levofloxacin (0.1-1%), Moxifloxacin (0.1-1%)                                                                                                                       |
|                                    | Acute hepatic failure                                        |                                                                                                                                                      | Ciprofloxacin, Norfloxacin, Levofloxacin (postmarketing), Moxifloxacin (postmarketing)                                                                             |
|                                    | Acute hepatic necrosis                                       |                                                                                                                                                      | Ciprofloxacin, Norfloxacin, Moxifloxacin (postmarketing)                                                                                                           |
|                                    | Cholestasis/Cholestatic jaundice                             |                                                                                                                                                      | Nalidixic acid, Ciprofloxacin, Norfloxacin, Levofloxacin (postmarketing), Moxifloxacin (postmarketing)                                                             |
|                                    | Hepatitis                                                    |                                                                                                                                                      | Ciprofloxacin, Norfloxacin, Levofloxacin (postmarketing), Moxifloxacin (postmarketing)                                                                             |
| <b>Renal and Urinary Disorders</b> | Abnormal renal function                                      | Delafloxacin ( $< 2\%$ )                                                                                                                             | Levofloxacin (0.1-1%)                                                                                                                                              |
|                                    | Abnormal urine                                               |                                                                                                                                                      | Gemifloxacin ( $\leq 0.1\%$ )                                                                                                                                      |
|                                    | Acute renal insufficiency or failure                         | Delafloxacin ( $< 2\%$ )                                                                                                                             | Ciprofloxacin, Norfloxacin, Levofloxacin (0.1-1%), Moxifloxacin (0.1-1%), Gemifloxacin (postmarketing)                                                             |
|                                    | Dysuria                                                      |                                                                                                                                                      | Ofloxacin (1-3%) Moxifloxacin (0.1-1%)                                                                                                                             |
|                                    | Interstitial nephritis                                       |                                                                                                                                                      | Ciprofloxacin, Norfloxacin, Levofloxacin (postmarketing), Moxifloxacin (postmarketing)                                                                             |
|                                    | Urinary retention                                            |                                                                                                                                                      | Ofloxacin (1-3%)                                                                                                                                                   |
|                                    | Crystalluria                                                 |                                                                                                                                                      | Ciprofloxacin, Norfloxacin                                                                                                                                         |
|                                    | Albuminuria                                                  |                                                                                                                                                      | Norfloxacin                                                                                                                                                        |
|                                    | Candiduria                                                   |                                                                                                                                                      | Norfloxacin                                                                                                                                                        |
|                                    | Cylindruria                                                  |                                                                                                                                                      | Ciprofloxacin, Norfloxacin                                                                                                                                         |
|                                    | Hematuria                                                    |                                                                                                                                                      | Ciprofloxacin, Norfloxacin                                                                                                                                         |
|                                    | Agranulocytosis                                              |                                                                                                                                                      | Ciprofloxacin, Norfloxacin, Moxifloxacin (postmarketing)                                                                                                           |

| Affected system                                   | Symptom                                          | Higher risk                 | Lower risk                                                                                                                       |
|---------------------------------------------------|--------------------------------------------------|-----------------------------|----------------------------------------------------------------------------------------------------------------------------------|
| <b>Blood/<br/>Lymphatic<br/>system</b>            | Anaemia<br>(eg. hemolytic,<br>aplastic)          | Moxifloxacin ( $\geq 1\%$ ) | Nalidixic acid, Ciprofloxacin,<br>Norfloxacin, Levofloxacin (0.1-1%),<br>Gemifloxacin ( $\leq 0.1\%$ )                           |
|                                                   | Granulocytopenia                                 |                             | Levofloxacin (0.1-1%),<br>Gemifloxacin ( $\leq 0.1\%$ )                                                                          |
|                                                   | Leukocytosis                                     |                             | Ciprofloxacin, Moxifloxacin (0.1-1%)                                                                                             |
|                                                   | Leukopenia                                       |                             | Nalidixic acid, Ciprofloxacin,<br>Norfloxacin, Levofloxacin<br>(postmarketing), Moxifloxacin (0.1-1%),<br>Gemifloxacin (0.1-1%)  |
|                                                   | Monocytosis                                      |                             | Ciprofloxacin                                                                                                                    |
|                                                   | Neutropenia                                      |                             | Norfloxacin, Moxifloxacin (0.1-1%),<br>Gemifloxacin (0.5%)                                                                       |
|                                                   | Neutrophilia                                     |                             | Gemifloxacin (0.5%)                                                                                                              |
|                                                   | Pancytopenia                                     |                             | Ciprofloxacin, Norfloxacin,<br>Levofloxacin (postmarketing),<br>Moxifloxacin (postmarketing)                                     |
|                                                   | Petechia                                         |                             | Ciprofloxacin                                                                                                                    |
|                                                   | Thrombocythemia                                  |                             | Ciprofloxacin, Moxifloxacin (0.1-1%),<br>Gemifloxacin (0.1-1%)                                                                   |
|                                                   | Thrombocytopenia                                 |                             | Nalidixic acid, Ciprofloxacin,<br>Norfloxacin, Levofloxacin (0.1-1%),<br>Moxifloxacin (0.1-1%),<br>Gemifloxacin ( $\leq 0.1\%$ ) |
|                                                   | Thrombotic<br>thrombocytopenic<br>purpura        |                             | Ciprofloxacin, Norfloxacin                                                                                                       |
| <b>Metabolism and<br/>Nutrition<br/>Disorders</b> | Cholesterol<br>elevation                         | Ofloxacin (1-3%)            |                                                                                                                                  |
|                                                   | Decreased appetite                               |                             | Moxifloxacin (0.1-1%)                                                                                                            |
|                                                   | Dehydration                                      |                             | Moxifloxacin (0.1-1%)                                                                                                            |
|                                                   | Hyperglycemia                                    | Delafloxacin ( $< 2\%$ )    | Ciprofloxacin, Levofloxacin (0.1-1%),<br>Moxifloxacin (0.1-1%),<br>Gemifloxacin (0.1-1%)                                         |
|                                                   | Hyperlipidemia                                   |                             | Moxifloxacin (0.1-1%)                                                                                                            |
|                                                   | Hypoglycemia                                     |                             | Ciprofloxacin, Norfloxacin,<br>Levofloxacin (0.1-1%)                                                                             |
|                                                   | Thirst                                           |                             | Ofloxacin (1-3%)                                                                                                                 |
| <b>Skin and Allergic<br/>Reactions</b>            | Weight Loss                                      |                             | Ofloxacin (1-3%)                                                                                                                 |
|                                                   | Acute generalised<br>exanthematous<br>pustulosis |                             | Ciprofloxacin                                                                                                                    |
|                                                   | Allergic dermatitis                              |                             | Moxifloxacin (0.1-1%),<br>Gemifloxacin (0.1-1%)                                                                                  |
|                                                   | Allergic<br>pneumonitis                          |                             | Ciprofloxacin, Norfloxacin,<br>Levofloxacin (postmarketing),<br>Moxifloxacin (postmarketing)                                     |
|                                                   | Allergic reaction                                |                             | Levofloxacin (0.1-1%)                                                                                                            |

| Affected system | Symptom                                               | Higher risk                                                                                                                                   | Lower risk                                                                                                                           |
|-----------------|-------------------------------------------------------|-----------------------------------------------------------------------------------------------------------------------------------------------|--------------------------------------------------------------------------------------------------------------------------------------|
|                 | Anaphylactoid reaction (including anaphylactic shock) |                                                                                                                                               | Nalidixic acid, Ciprofloxacin, Norfloxacin, Levofloxacin (postmarketing), Moxifloxacin (postmarketing), Gemifloxacin (postmarketing) |
|                 | Angioedema (including laryngeal edema)                |                                                                                                                                               | Nalidixic acid, Ciprofloxacin, Norfloxacin, Ofloxacin (1-3%), Moxifloxacin (postmarketing)                                           |
|                 | Angioneurotic edema                                   |                                                                                                                                               | Levofloxacin (postmarketing)                                                                                                         |
|                 | Arthralgia with joint stiffness and swelling          |                                                                                                                                               | Nalidixic acid                                                                                                                       |
|                 | Atopic dermatitis                                     |                                                                                                                                               | Gemifloxacin ( $\leq 0.1\%$ )                                                                                                        |
|                 | Contact dermatitis                                    |                                                                                                                                               | Nadifloxacin                                                                                                                         |
|                 | Dermatitis                                            | Delafloxacin ( $< 2\%$ )                                                                                                                      |                                                                                                                                      |
|                 | Diaphoresis                                           |                                                                                                                                               | Ofloxacin (1-3%)                                                                                                                     |
|                 | Dry skin                                              |                                                                                                                                               | Nadifloxacin                                                                                                                         |
|                 | Erythema                                              | Delafloxacin ( $< 2\%$ )                                                                                                                      | Nadifloxacin, Moxifloxacin (0.1-1%)                                                                                                  |
|                 | <i>Erythema Multiforme</i>                            |                                                                                                                                               | Nalidixic acid, Ciprofloxacin, Levofloxacin (postmarketing), Gemifloxacin (postmarketing)                                            |
|                 | <i>Erythema Nodosum</i>                               |                                                                                                                                               | Ciprofloxacin                                                                                                                        |
|                 | Exfoliative dermatitis                                |                                                                                                                                               | Ciprofloxacin                                                                                                                        |
|                 | Fever                                                 | Ofloxacin (1-3%), Moxifloxacin ( $\geq 1\%$ )                                                                                                 | Ciprofloxacin, Norfloxacin, Levofloxacin (postmarketing)                                                                             |
|                 | Fixed eruption                                        |                                                                                                                                               | Ciprofloxacin                                                                                                                        |
|                 | Flushing                                              | Delafloxacin ( $< 2\%$ )                                                                                                                      | Ciprofloxacin, Gemifloxacin ( $\leq 0.1\%$ ), Nadifloxacin                                                                           |
|                 | Hypersensitivity                                      | Delafloxacin ( $< 2\%$ )                                                                                                                      | Ciprofloxacin                                                                                                                        |
|                 | Hypopigmentation of the skin                          |                                                                                                                                               | Nadifloxacin                                                                                                                         |
|                 | Leukocytoclastic vasculitis                           |                                                                                                                                               | Levofloxacin (postmarketing)                                                                                                         |
|                 | Papules                                               |                                                                                                                                               | Nadifloxacin                                                                                                                         |
|                 | Photosensitivity/Phototoxicity reactions              |                                                                                                                                               | Nalidixic acid, Ciprofloxacin, Norfloxacin, Levofloxacin (postmarketing), Moxifloxacin (postmarketing), Gemifloxacin (0.039%)        |
|                 | Pruritus                                              | Nalidixic acid, Ofloxacin (1-3%), Nadifloxacin ( $> 1.8\%$ ), Levofloxacin ( $\geq 1\%$ ), Delafloxacin ( $< 2\%$ )                           | Ciprofloxacin, Pefloxacin, Norfloxacin, Moxifloxacin (0.1-1%), Gemifloxacin (0.1-1%)                                                 |
|                 | Rash                                                  | Nalidixic acid, Ciprofloxacin (1%), Norfloxacin, Ofloxacin (1-3%), Levofloxacin ( $\geq 1\%$ ), Gemifloxacin (3.5%), Delafloxacin ( $< 2\%$ ) | Pefloxacin, Moxifloxacin (0.1-1%)                                                                                                    |

| Affected system                             | Symptom                                        | Higher risk                        | Lower risk                                                                                                                                  |
|---------------------------------------------|------------------------------------------------|------------------------------------|---------------------------------------------------------------------------------------------------------------------------------------------|
|                                             | Serum sickness                                 |                                    | Ciprofloxacin, Norfloxacin, Levofloxacin (postmarketing)                                                                                    |
|                                             | Skin exfoliation                               |                                    | Gemifloxacin (postmarketing)                                                                                                                |
|                                             | Skin irritation                                | Delafloxacin (<2%)                 | Nadifloxacin                                                                                                                                |
|                                             | Skin warmth                                    |                                    | Nadifloxacin                                                                                                                                |
|                                             | Stevens-Johnson Syndrome                       |                                    | Nalidixic acid, Ciprofloxacin, Norfloxacin, Levofloxacin (postmarketing), Moxifloxacin (postmarketing)                                      |
|                                             | Sweating                                       |                                    | Ciprofloxacin                                                                                                                               |
|                                             | Toxic epidermal necrolysis                     |                                    | Levofloxacin (postmarketing), Moxifloxacin (postmarketing)                                                                                  |
|                                             | Urticaria                                      | Nalidixic acid, Delafloxacin (<2%) | Ciprofloxacin, Pefloxacin, Norfloxacin, Ofloxacin (1-3%), Nadifloxacin, Levofloxacin (0.1-1%), Moxifloxacin (0.1-1%), Gemifloxacin (0.1-1%) |
| <b>Genital/<br/>Reproductive<br/>System</b> | Burning, pain and rash of the female genitalia |                                    | Ofloxacin (<1%)                                                                                                                             |
|                                             | Dysmenorrhea                                   |                                    | Ofloxacin (<1%)                                                                                                                             |
|                                             | External genital pruritus (in women)           | Ofloxacin (6%)                     | Gemifloxacin (0.1-1%)                                                                                                                       |
|                                             | Genital moniliasis                             |                                    | Levofloxacin (0.1-1%), Gemifloxacin (0.1-1%)                                                                                                |
|                                             | Menorrhagia                                    |                                    | Ofloxacin (<1%)                                                                                                                             |
|                                             | Metrorrhagia                                   |                                    | Ofloxacin (<1%)                                                                                                                             |
|                                             | Vaginal and/ or Vulvovaginal candidiasis       | Delafloxacin (<2%)                 | Ciprofloxacin, Norfloxacin, Moxifloxacin (0.1-1.%)                                                                                          |
|                                             | Vaginal discharge                              | Ofloxacin (1-3%)                   |                                                                                                                                             |
|                                             | Vaginal infection                              |                                    | Moxifloxacin (0.1-1.%)                                                                                                                      |
|                                             | Vaginitis                                      | Ofloxacin (5%), Levofloxacin (≥1%) | Gemifloxacin (0.1-1%)                                                                                                                       |
| <b>Laboratory<br/>Abnormalities</b>         | Decreased CPK (Creatine Phosphokinase)         |                                    | Gemifloxacin (0.2%)                                                                                                                         |
|                                             | Decreased Hematocrit and/or Hemoglobin         |                                    | Norfloxacin (0.6%), Moxifloxacin (0.1-1%), Gemifloxacin (0.3%)                                                                              |
|                                             | Decreased Platelet Count                       | Norfloxacin(1.0%)                  | Gemifloxacin (0.2%)                                                                                                                         |
|                                             | Decreased PT (Prothrombin Time)                |                                    | Ciprofloxacin                                                                                                                               |
|                                             | Decreased RBC (Red Blood Cells)                |                                    | Gemifloxacin (0.1%)                                                                                                                         |
|                                             | Decreased Total Protein                        |                                    | Gemifloxacin (0.2%)                                                                                                                         |

| Affected system | Symptom                                                                                                       | Higher risk                                        | Lower risk                                                                                                      |
|-----------------|---------------------------------------------------------------------------------------------------------------|----------------------------------------------------|-----------------------------------------------------------------------------------------------------------------|
|                 | Decreased WBC<br>(White Blood Cells)                                                                          | Norfloxacin (1.3%)                                 |                                                                                                                 |
|                 | Eosinophilia                                                                                                  |                                                    | Ciprofloxacin, Levofloxacin<br>(postmarketing), Norfloxacin<br>(0.6%), Moxifloxacin (0.1-1%),<br>Naladixic acid |
|                 | Hypercalcemia                                                                                                 |                                                    | Gemifloxacin (<0.1%)                                                                                            |
|                 | Hyperkalemia                                                                                                  |                                                    | Ciprofloxacin, Levofloxacin (0.1-<br>1%), Gemifloxacin (0.3%)                                                   |
|                 | Hypernatremia                                                                                                 |                                                    | Gemifloxacin (0.1%)                                                                                             |
|                 | Hypoalbuminemia                                                                                               |                                                    | Gemifloxacin (0.3%)                                                                                             |
|                 | Hypocalcemia                                                                                                  |                                                    | Gemifloxacin (0.1%)                                                                                             |
|                 | Hypokalemia                                                                                                   | Moxifloxacin ( $\geq 1\%$ )                        | Gemifloxacin (0.1%)                                                                                             |
|                 | Hyponatremia                                                                                                  |                                                    | Gemifloxacin (0.1-1%)                                                                                           |
|                 | Increased ALP<br>(Alkaline<br>Phosphatase)                                                                    | Delafloxacin (<2%)                                 | Ciprofloxacin, Levofloxacin (0.1-<br>1%), Moxifloxacin (0.1-1%),<br>Gemifloxacin (0.4%)                         |
|                 | Increased ALT<br>(Alanine<br>Transaminase)                                                                    | Moxifloxacin ( $\geq 1\%$ )<br>Gemifloxacin (1.7%) | Ciprofloxacin                                                                                                   |
|                 | Increased AST<br>(Aspartate<br>Aminotransferase)<br>(SGOT - Serum<br>glutamic<br>oxaloacetic<br>transaminase) | Norfloxacin (1.6%), Gemifloxacin<br>(0.13%)        | Ciprofloxacin, Moxifloxacin (0.1-<br>1%)                                                                        |
|                 | Increased blood<br>amylase                                                                                    |                                                    | Moxifloxacin (0.1-1%)                                                                                           |
|                 | Increased blood<br>CPK (Creatine<br>Phosphokinase)                                                            | Delafloxacin (<2%)                                 | Ciprofloxacin, Moxifloxacin (0.1-<br>1%), Gemifloxacin (0.7%)                                                   |
|                 | Increased blood<br>uric acid                                                                                  |                                                    | Ciprofloxacin, Moxifloxacin (0.1-<br>1%)                                                                        |
|                 | Increased BUN<br>(Blood Urea<br>Nitrogen)                                                                     |                                                    | Ciprofloxacin, Moxifloxacin (0.1-<br>1%), Gemifloxacin (0.3%)                                                   |
|                 | Increased LDH<br>(Lactate<br>Dehydrogenase)                                                                   |                                                    | Ciprofloxacin, Moxifloxacin (0.1-<br>1%), Gemifloxacin (<0.1%)                                                  |
|                 | Increased lipase                                                                                              |                                                    | Norfloxacin (0.6%)                                                                                              |
|                 | Increased GGT<br>(gamma-Glutamyl<br>Transferase)                                                              |                                                    | Moxifloxacin (0.1-1%),<br>Gemifloxacin ( $\leq 0.1\%$ )                                                         |
|                 | Increased<br>Hematocrit and/or<br>Hemoglobin                                                                  |                                                    | Ciprofloxacin, Gemifloxacin<br>(0.1+ %)                                                                         |
|                 | Increased hepatic<br>enzymes                                                                                  | Delafloxacin (3%)                                  | Levofloxacin (0.1-1%),                                                                                          |

| Affected system | Symptom                                                | Higher risk                                           | Lower risk                                                         |
|-----------------|--------------------------------------------------------|-------------------------------------------------------|--------------------------------------------------------------------|
|                 | Increased muscle enzymes                               |                                                       | Levofloxacin (postmarketing)                                       |
|                 | Increased non-proteins Nitrogen                        |                                                       | Gemifloxacin ( $\leq 0.1\%$ )                                      |
|                 | Increased triglycerides                                |                                                       | Moxifloxacin (0.1-1%)                                              |
|                 | Methemoglobinemia                                      |                                                       | Ciprofloxacin                                                      |
|                 | Prolonged aPTT (activated Partial Thromboplastin Time) |                                                       | Moxifloxacin (0.1-1%)                                              |
|                 | Prolonged INR (International Normalized Ratio)         |                                                       | Ciprofloxacin, Gemifloxacin (postmarketing)                        |
|                 | Prolonged PT (Prothrombin Time)                        |                                                       | Ciprofloxacin, Levofloxacin (postmarketing), Moxifloxacin (0.1-1%) |
| Other           | Anal/ Rectal pain                                      |                                                       | Norfloxacin (0.3-1.0%)                                             |
|                 | Bleeding diathesis                                     |                                                       | Ciprofloxacin                                                      |
|                 | Chest discomfort/pain                                  | Ofloxacin (1-3%), Levofloxacin ( $\geq 1\%$ )         | Moxifloxacin (0.1-1%), Moxifloxacin (0.1-1%)                       |
|                 | Chills                                                 |                                                       | Ofloxacin ( $< 1\%$ ), Moxifloxacin (0.1-1%)                       |
|                 | Discomfort                                             | Delafloxacin ( $< 2\%$ )                              |                                                                    |
|                 | Extremity pain                                         |                                                       | Ofloxacin ( $< 1\%$ )                                              |
|                 | Facial edema                                           |                                                       | Ciprofloxacin, Gemifloxacin ( $\leq 0.1\%$ )                       |
|                 | Facial pain                                            |                                                       | Moxifloxacin (0.1-1%)                                              |
|                 | Fatigue                                                | Ofloxacin (1-3%)                                      | Moxifloxacin (0.1-1%), Gemifloxacin (0.1-1%)                       |
|                 | Fungal infections                                      | Delafloxacin ( $< 2\%$ )                              | Moxifloxacin (0.1-1%), Gemifloxacin (0.1-1%)                       |
|                 | Hemorrhage                                             |                                                       | Gemifloxacin (postmarketing)                                       |
|                 | Hot flashes                                            |                                                       | Gemifloxacin ( $\leq 0.1\%$ )                                      |
|                 | Hyperhidrosis                                          |                                                       | Norfloxacin (0.3-1.0%), Moxifloxacin (0.1-1%)                      |
|                 | Infusion site bruise                                   | Delafloxacin ( $< 2\%$ )                              |                                                                    |
|                 | Injection site reactions                               | Levofloxacin ( $\geq 1\%$ ), Delafloxacin ( $< 2\%$ ) | Moxifloxacin (0.1-1%)                                              |
|                 | Metabolic acidosis                                     |                                                       | Nalidixic acid, Ciprofloxacin, Norfloxacin                         |
|                 | Monoliasis                                             | Levofloxacin ( $\geq 1\%$ )                           |                                                                    |
|                 | Multiple organ dysfunction syndrome                    |                                                       | Levofloxacin (postmarketing)                                       |
|                 | Night Sweats                                           |                                                       | Moxifloxacin (0.1-1%)                                              |

| Affected system | Symptom    | Higher risk                             | Lower risk                                                                        |
|-----------------|------------|-----------------------------------------|-----------------------------------------------------------------------------------|
|                 | Pain       |                                         | Ciprofloxacin, Ofloxacin (<1%),<br>Moxifloxacin (0.1-1%),<br>Gemifloxacin (≤0.1%) |
|                 | Phlebitis  | Delafloxacin (<2%)                      | Levofloxacin (0.1-1%), Moxifloxacin<br>(0.1-1%)                                   |
|                 | Swelling   | Delafloxacin (<2%)                      |                                                                                   |
|                 | Thrombosis | Delafloxacin (<2%)                      |                                                                                   |
|                 | Trunk pain | Ofloxacin (1-3%), Delafloxacin<br>(<2%) |                                                                                   |
|                 | Vasculitis |                                         | Ciprofloxacin, Norfloxacin,<br>Ofloxacin (1-3%)                                   |

<sup>1</sup> References: Besifloxacin [21], Ciprofloxacin [22], Delafloxacin [23], Finafloxacin [18,24], Gemifloxacin [25], Levofloxacin [26], Moxifloxacin [27], Nadifloxacin [28], Nalidixic acid [29], Norfloxacin [30], Ofloxacin [31], Pefloxacin [32].

**Table S3.** Pathogens classified by WHO according to the urgency of antibiotic discovery need [33].

| Critical priority                                                     | High priority                                                                        | Medium priority                                                 |
|-----------------------------------------------------------------------|--------------------------------------------------------------------------------------|-----------------------------------------------------------------|
| <i>Acinetobacter baumannii</i> ,<br>carbapenem – R <sup>1</sup>       | <i>Enterococcus faecium</i> ,<br>vancomycin – R                                      | <i>Streptococcus pneumoniae</i> ,<br>penicillin-non-susceptible |
| <i>Pseudomonas aeruginosa</i> ,<br>carbapenem – R                     | <i>Staphylococcus aureus</i> ,<br>methicillin – R<br>vancomycin – I <sup>1</sup> , R | <i>Haemophilus influenzae</i> ,<br>ampicillin – R               |
| Enterobacteriaceae,<br>carbapenem – R<br>ESBL <sup>1</sup> -producing | <i>Helicobacter pylori</i> ,<br>clarithromycin – R                                   | <i>Shigella</i> spp.,<br>fluoroquinolone – R                    |
|                                                                       | <i>Campylobacter</i> spp.,<br>fluoroquinolone – R                                    |                                                                 |
|                                                                       | <i>Salmonellae</i> ,<br>fluoroquinolone – R                                          |                                                                 |
|                                                                       | <i>Neisseria gonorrhoeae</i> ,<br>cephalosporin – R<br>fluoroquinolone – R           |                                                                 |

<sup>1</sup> R = resistant; ESBL = extended spectrum  $\beta$ -lactamase; I = intermediate



**Table S4.** The emergence of resistance to newer antibiotics (Ref. = references).

| Antibiotic                                                 | Resistant bacteria             | Resistance rate                                        | Ref.       |
|------------------------------------------------------------|--------------------------------|--------------------------------------------------------|------------|
| Tigecycline<br>(initial US Approval: 2005) [34]            | <i>Acinetobacter baumannii</i> | –                                                      | [35]       |
| Ceftolozane/tazobactam<br>(initial US Approval: 2014) [36] | <i>Pseudomonas aeruginosa</i>  | 0 – 8.3%                                               | [37]       |
|                                                            | Enterobacteriaceae             | <0.6% (overall)                                        | [39–43]    |
|                                                            |                                | <2.3 % (MDR <sup>1</sup> and XDR <sup>1</sup> strains) | [40,44,45] |
|                                                            |                                | 24.7% (CR <sup>1</sup> strains)                        | [41,46,47] |
|                                                            |                                | 90.8 – 98.6% (most MBL <sup>1</sup> -positive strains) | [41,42,48] |
| Ceftazidime/avibactam<br>(initial US Approval: 2015) [38]  | <i>Klebsiella pneumoniae</i>   | <5.2% (overall)                                        | [48–50]    |
|                                                            |                                | 16.7% or up to 21% (CR <sup>1</sup> strains)           | [50,51]    |
|                                                            | <i>Pseudomonas aeruginosa</i>  | 2.9%                                                   | [44]       |
|                                                            |                                | 18%                                                    | [52]       |
|                                                            |                                | >95% (MBL <sup>1</sup> -positive strains)              | [48,53]    |
|                                                            | <i>Acinetobacter baumannii</i> | >55%                                                   | [54,55]    |
|                                                            |                                | 73.6% (strains from intensive care units)              | [54]       |
| Cefiderocol<br>(initial US Approval: 2019) [56]            | <i>Acinetobacter baumannii</i> | –                                                      | [57]       |

<sup>1</sup> MDR = multidrug-resistant; XDR = extensively drug-resistant; CR = carbapenem-resistant; MBL = metallo- $\beta$ -lactamase; ESBL = extended spectrum  $\beta$ -lactamase

## References

1. Wilson and Gisvold's Textbook of Organic Medicinal and Pharmaceutical Chemistry; Wilson, C.O., Beale, J.M., Block, J.H., Eds.; 12th ed.; Lippincott Williams & Wilkins: Baltimore, MD, 2011; ISBN 978-0-7817-7929-6.
2. Gonzalez, J.P.; Henwood, J.M. Pefloxacin. A Review of Its Antibacterial Activity, Pharmacokinetic Properties and Therapeutic Use. *Drugs* **1989**, *37*, 628–668, doi:10.2165/00003495-198937050-00003.
3. Martindale: The Complete Drug Reference; Martindale, W., Sweetman, S.C., Eds.; 36. ed.; Pharmaceuticale Press, PhP: London ; Chicago, 2009; ISBN 978-0-85369-840-1.
4. Nenoff, P. Acne Vulgaris and Bacterial Skin Infections: Review of the Topical Quinolone Nadifloxacin. *Expert Review of Dermatology* **2006**, *1*, 643–654, doi:10.1586/17469872.1.5.643.
5. Sukul, P.; Spitteller, M. Fluoroquinolone Antibiotics in the Environment. *Rev Environ Contam Toxicol* **2007**, *191*, 131–162, doi:10.1007/978-0-387-69163-3\_5.
6. Reviews of Environmental Contamination and Toxicology 191; Ware, G., Ed.; Reviews of Environmental Contamination and Toxicology; Springer-Verlag: New York, 2007; ISBN 978-0-387-69162-6.
7. Limberakis, C. Quinolone Antibiotics: Levofloxacin (Levaquin®), Moxifloxacin (Avelox®), Gemifloxacin (Factive®), and Garenoxacin (T-3811). In *The Art of Drug Synthesis*; John Wiley & Sons, Ltd, 2007; pp. 39–69 ISBN 978-0-470-13497-9.
8. Saravolatz, L.D.; Leggett, J. Gatifloxacin, Gemifloxacin, and Moxifloxacin: The Role of 3 Newer Fluoroquinolones. *Clin Infect Dis* **2003**, *37*, 1210–1215, doi:10.1086/378809.
9. Caeiro, J.-P.; Iannini, P.B. Moxifloxacin (Avelox®): A Novel Fluoroquinolone with a Broad Spectrum of Activity. *Expert Review of Anti-infective Therapy* **2003**, *1*, 363–370, doi:10.1586/14787210.1.3.363.
10. Al Omari, MMH; Jaafari, D.S.; Al-Sou'od, K.A.; Badwan, A.A. Chapter Seven - Moxifloxacin Hydrochloride. In *Profiles of Drug Substances, Excipients and Related Methodology*; Brittain, H.G., Ed.; Academic Press, 2014; Vol. 39, pp. 299–431.
11. Avelox, Moxifloxacin Systemic (Moxifloxacin) Dosing, Indications, Interactions, Adverse Effects, and More Available online: <https://reference.medscape.com/drug/avelox-moxifloxacin-systemic-moxifloxacin-342537> (accessed on 15 July 2021).
12. Pham, T.D.M.; Ziora, Z.M.; Blaskovich, M.A.T. Quinolone Antibiotics. *Medchemcomm* **2019**, *10*, 1719–1739, doi:10.1039/c9md00120d.
13. Anonymous Factive: Withdrawn Application Available online: <https://www.ema.europa.eu/en/medicines/human/withdrawn-applications/factive> (accessed on 14 July 2021).
14. Factive (Gemifloxacin) Dosing, Indications, Interactions, Adverse Effects, and More Available online: <https://reference.medscape.com/drug/factive-gemifloxacin-342529> (accessed on 15 July 2021).
15. Tótolí, E.G.; Salgado, H.R.N. Besifloxacin: A Critical Review of Its Characteristics, Properties, and Analytical Methods. *Critical Reviews in Analytical Chemistry* **2018**, *48*, 132–142, doi:10.1080/10408347.2018.1429885.
16. Besifloxacin Ophthalmic (Rx) (Voreloxin) Dosing, Indications, Interactions, Adverse Effects, and More Available online: <https://reference.medscape.com/drug/besivance-besifloxacin-ophthalmic-999210> (accessed on 15 July 2021).
17. Wetzel, C.; Lonneman, M.; Wu, C. Polypharmacological Drug Actions of Recently FDA Approved Antibiotics. *European Journal of Medicinal Chemistry* **2021**, *209*, 112931, doi:10.1016/j.ejmech.2020.112931.
18. XTORO (Finaxofloxacin Otic Suspension) 0.3% For Topical Otic Administration HIGHLIGHTS OF PRESCRIBING INFORMATION (206307s000lbl.Pdf).
19. Markham, A. Delafloxacin: First Global Approval. *Drugs* **2017**, *77*, 1481–1486, doi:10.1007/s40265-017-0790-5.

20. Baxdela (Delafoxacin) Dosing, Indications, Interactions, Adverse Effects, and More Available online: <https://reference.medscape.com/drug/baxdela-delafoxacin-1000153> (accessed on 15 July 2021).
21. HIGHLIGHTS OF PRESCRIBING INFORMATION Besivance™ (Besifloxacin Ophthalmic Suspension) 0.6%.
22. HIGHLIGHTS OF PRESCRIBING INFORMATION CIPRO® (Ciprofloxacin Hydrochloride) Tablet, for Oral Use CIPRO® (Ciprofloxacin Hydrochloride), for Oral Suspension.
23. HIGHLIGHTS OF PRESCRIBING INFORMATION BAXDELA (Delafoxacin) Tablets, for Oral Use BAXDELA (Delafoxacin) for Injection, for Intravenous Use.
24. Cross-Discipline Team Leader Review XTORO (Finafloxacin Otic Suspension) 0.3%.
25. PRESCRIBING INFORMATION FACTIVE® (Gemifloxacin Mesylate) Tablets.
26. HIGHLIGHTS OF PRESCRIBING INFORMATION LEVAQUIN® (Levofloxacin) Tablet, Film Coated for Oral Use LEVAQUIN® (Levofloxacin) Solution for Oral Use LEVAQUIN® (Levofloxacin) Injection, Solution, Concentrate for Intravenous Use LEVAQUIN® (Levofloxacin) Injection, Solution for Intravenous Use.
27. HIGHLIGHTS OF PRESCRIBING INFORMATION AVELOX (Moxifloxacin Hydrochloride) Tablets, for Oral Use AVELOX (Moxifloxacin Hydrochloride) Injection, for Intravenous Use.
28. Core Safety Profile Active Substance: Nadifloxacin Pharmaceutical Form(s)/Strength: 1% Cream.
29. NegGram® Caplets (Nalidixic Acid, USP).
30. TABLETS NOROXIN® (NORFLOXACIN).
31. FLOXIN® Tablets (Ofloxacin Tablets).
32. Pefloxacin Available online: <https://go.drugbank.com/drugs/DB00487> (accessed on 21 October 2021).
33. WHO Publishes List of Bacteria for Which New Antibiotics Are Urgently Needed Available online: <https://www.who.int/news/item/27-02-2017-who-publishes-list-of-bacteria-for-which-new-antibiotics-are-urgently-needed> (accessed on 3 July 2021).
34. TYGACIL® (Tigecycline) FOR INJECTION for Intravenous Use - PRESCRIBING INFORMATION (021821s0211bl.Pdf).
35. Wang, L.; Liu, D.; Lv, Y.; Cui, L.; Li, Y.; Li, T.; Song, H.; Hao, Y.; Shen, J.; Wang, Y.; et al. Novel Plasmid-Mediated Tet(X5) Gene Conferring Resistance to Tigecycline, Eravacycline, and Omadacycline in a Clinical *Acinetobacter Baumannii* Isolate. *Antimicrob Agents Chemother* **2019**, *64*, e01326-19, doi:10.1128/AAC.01326-19.
36. ZERBAXA® (Ceftolozane and Tazobactam) for Injection, for Intravenous Use - PRESCRIBING INFORMATION (Zerbaxa\_pi.Pdf).
37. Wi, YM; Greenwood-Quaintance, K.E.; Schuetz, A.N.; Ko, KS; Peck, K.R.; Song, J.-H.; Patel, R. Activity of Ceftolozane-Tazobactam against Carbapenem-Resistant, Non-Carbapenemase-Producing *Pseudomonas Aeruginosa* and Associated Resistance Mechanisms. *Antimicrob Agents Chemother* **2017**, *62*, e01970-17, doi:10.1128/AAC.01970-17.
38. AVYCAZ (Ceftazidime and Avibactam) for Injection, for Intravenous Use - PRESCRIBING INFORMATION (Avycaz\_Final\_PI\_CBE-0\_10\_2019.Pdf).
39. Wang, Y.; Wang, J.; Wang, R.; Cai, Y. Resistance to Ceftazidime–Avibactam and Underlying Mechanisms. *Journal of Global Antimicrobial Resistance* **2020**, *22*, 18–27, doi:10.1016/j.jgar.2019.12.009.
40. Wise, MG; Estabrook, M.A.; Sahm, D.F.; Stone, G.G.; Kazmierczak, K.M. Prevalence of Mcr-Type Genes among Colistin-Resistant Enterobacteriaceae Collected in 2014–2016 as Part of the INFORM Global Surveillance Program. *PLoS One* **2018**, *13*, e0195281, doi:10.1371/journal.pone.0195281.
41. de Jonge, BLM; Karlowsky, J.A.; Kazmierczak, K.M.; Biedenbach, D.J.; Sahm, D.F.; Nichols, W.W. In Vitro Susceptibility to Ceftazidime-Avibactam of Carbapenem-Nonsusceptible Enterobacteriaceae Isolates Collected

- during the INFORM Global Surveillance Study (2012 to 2014). *Antimicrob Agents Chemother* **2016**, *60*, 3163–3169, doi:10.1128/AAC.03042-15.
42. Kazmierczak, K.M.; Bradford, P.A.; Stone, G.G.; de Jonge, B.L.M.; Sahm, D.F. In Vitro Activity of Ceftazidime-Avibactam and Aztreonam-Avibactam against OXA-48-Carrying Enterobacteriaceae Isolated as Part of the International Network for Optimal Resistance Monitoring (INFORM) Global Surveillance Program from 2012 to 2015. *Antimicrob Agents Chemother* **2018**, *62*, e00592-18, doi:10.1128/AAC.00592-18.
43. Kazmierczak, K.M.; de Jonge, B.L.M.; Stone, G.G.; Sahm, D.F. In Vitro Activity of Ceftazidime/Avibactam against Isolates of Enterobacteriaceae Collected in European Countries: INFORM Global Surveillance 2012-15. *J Antimicrob Chemother* **2018**, *73*, 2782–2788, doi:10.1093/jac/dky266.
44. Sader, H.S.; Castanheira, M.; Shortridge, D.; Mendes, R.E.; Flamm, R.K. Antimicrobial Activity of Ceftazidime-Avibactam Tested against Multidrug-Resistant Enterobacteriaceae and Pseudomonas Aeruginosa Isolates from US Medical Centers, 2013 to 2016. *Antimicrob Agents Chemother* **2017**, *61*, e01045-17, doi:10.1128/AAC.01045-17.
45. Sader, H.S.; Castanheira, M.; Mendes, R.E.; Flamm, R.K. Frequency and Antimicrobial Susceptibility of Gram-Negative Bacteria Isolated from Patients with Pneumonia Hospitalised in ICUs of US Medical Centres (2015-17). *J Antimicrob Chemother* **2018**, *73*, 3053–3059, doi:10.1093/jac/dky279.
46. Senchyna, F.; Gaur, R.L.; Sandlund, J.; Truong, C.; Tremintin, G.; Kültz, D.; Gomez, C.A.; Tamburini, F.B.; Andermann, T.; Bhatt, A.; et al. Diversity of Resistance Mechanisms in Carbapenem-Resistant Enterobacteriaceae at a Health Care System in Northern California, from 2013 to 2016. *Diagn Microbiol Infect Dis* **2019**, *93*, 250–257, doi:10.1016/j.diagmicrobio.2018.10.004.
47. Yin, D.; Wu, S.; Yang, Y.; Shi, Q.; Dong, D.; Zhu, D.; Hu, F.; China Antimicrobial Surveillance Network (CHINET) Study Group Results from the China Antimicrobial Surveillance Network (CHINET) in 2017 of the In Vitro Activities of Ceftazidime-Avibactam and Ceftolozane-Tazobactam against Clinical Isolates of Enterobacteriaceae and Pseudomonas Aeruginosa. *Antimicrob Agents Chemother* **2019**, *63*, e02431-18, doi:10.1128/AAC.02431-18.
48. Karlowsky, J.A.; Kazmierczak, K.M.; Bouchillon, S.K.; de Jonge, B.L.M.; Stone, G.G.; Sahm, D.F. In Vitro Activity of Ceftazidime-Avibactam against Clinical Isolates of Enterobacteriaceae and Pseudomonas Aeruginosa Collected in Asia-Pacific Countries: Results from the INFORM Global Surveillance Program, 2012 to 2015. *Antimicrob Agents Chemother* **2018**, *62*, e02569-17, doi:10.1128/AAC.02569-17.
49. Hackel, M.; Kazmierczak, K.M.; Hoban, D.J.; Biedenbach, D.J.; Bouchillon, S.K.; de Jonge, B.L.M.; Stone, G.G. Assessment of the In Vitro Activity of Ceftazidime-Avibactam against Multidrug-Resistant Klebsiella Spp. Collected in the INFORM Global Surveillance Study, 2012 to 2014. *Antimicrob Agents Chemother* **2016**, *60*, 4677–4683, doi:10.1128/AAC.02841-15.
50. Flamm, R.K.; Nichols, W.W.; Sader, H.S.; Farrell, D.J.; Jones, R.N. In Vitro Activity of Ceftazidime/Avibactam against Gram-Negative Pathogens Isolated from Pneumonia in Hospitalised Patients, Including Ventilated Patients. *Int J Antimicrob Agents* **2016**, *47*, 235–242, doi:10.1016/j.ijantimicag.2016.01.004.
51. Wilson, W.R.; Kline, E.G.; Jones, C.E.; Morder, K.T.; Mettus, R.T.; Doi, Y.; Nguyen, M.H.; Clancy, C.J.; Shields, R.K. Effects of KPC Variant and Porin Genotype on the In Vitro Activity of Meropenem-Vaborbactam against Carbapenem-Resistant Enterobacteriaceae. *Antimicrob Agents Chemother* **2019**, *63*, e02048-18, doi:10.1128/AAC.02048-18.
52. Gonzalez, M.D.; McMullen, A.R.; Wallace, M.A.; Crotty, M.P.; Ritchie, D.J.; Burnham, C.A.D. Susceptibility of Ceftolozane-Tazobactam and Ceftazidime-Avibactam Against a Collection of  $\beta$ -Lactam-Resistant Gram-Negative Bacteria. *Ann Lab Med* **2017**, *37*, 174–176, doi:10.3343/alm.2017.37.2.174.

- 
53. Kazmierczak, K.M.; de Jonge, B.L.M.; Stone, G.G.; Sahm, D.F. In Vitro Activity of Ceftazidime/Avibactam against Isolates of *Pseudomonas Aeruginosa* Collected in European Countries: INFORM Global Surveillance 2012-15. *J Antimicrob Chemother* **2018**, *73*, 2777–2781, doi:10.1093/jac/dky267.
  54. Sader, H.S.; Castanheira, M.; Flamm, R.K.; Mendes, R.E.; Farrell, D.J.; Jones, R.N. Ceftazidime/Avibactam Tested against Gram-Negative Bacteria from Intensive Care Unit (ICU) and Non-ICU Patients, Including Those with Ventilator-Associated Pneumonia. *Int J Antimicrob Agents* **2015**, *46*, 53–59, doi:10.1016/j.ijantimicag.2015.02.022.
  55. Hachem, R.; Reitzel, R.; Rolston, K.; Chaftari, A.-M.; Raad, I. Antimicrobial Activities of Ceftazidime-Avibactam and Comparator Agents against Clinical Bacteria Isolated from Patients with Cancer. *Antimicrob Agents Chemother* **2017**, *61*, e02106-16, doi:10.1128/AAC.02106-16.
  56. FETROJA (Cefiderocol) for Injection, for Intravenous Use - PRESCRIBING INFORMATION (Fetroja.Pdf).
  57. Malik, S.; Kaminski, M.; Landman, D.; Quale, J. Cefiderocol Resistance in *Acinetobacter Baumannii*: Roles of  $\beta$ -Lactamases, Siderophore Receptors, and Penicillin Binding Protein 3. *Antimicrob Agents Chemother* **2020**, *64*, e01221-20, doi:10.1128/AAC.01221-20.
